# Supplementary material for: Study of high-pressure thermophysical properties of orthocarbonate Sr3CO5 using deep learning molecular dynamics simulations
Source: Royal Society of Chemistry journal article supplement (doi:10.1039/d3cp04833k), 2024-01-01
Supplement: d3cp04833k1.pdf [file d3cp04833k1.pdf]

## Supporting Information for

### Study of high-pressure thermophysical properties for orthocarbonate $\text{Sr}_3\text{CO}_5$ using deep learning molecular dynamics simulations

**Xin-Xuan Wang<sup>a</sup>, Ting Song<sup>a, \*</sup>, Zhen-Shuai Lei<sup>b</sup>, Xiao-Wei Sun<sup>a</sup>,  
Jun-Hong Tian<sup>a</sup>, Zi-Jiang Liu<sup>a</sup>**

<sup>a</sup> *School of Mathematics and Physics, Lanzhou Jiaotong University, Lanzhou 730070, China*

<sup>b</sup> *Faculty of Science, Wuhan University of Technology, Wuhan 430079, China*

This supporting information lists the validation data for the calculation of elastic constants using the Deep Learning Potential Function model described in the main text, as well as the variation of elastic modulus, density and wave velocity as a function of temperature using the DP model.

---

\* Corresponding author.  
E-mail: [songting\\_lzjtu@yeah.net](mailto:songting_lzjtu@yeah.net)

Table S1 The  $C_{ij}$  (GPa),  $B$  (GPa),  $G$  (GPa),  $\rho$  (g/cm<sup>3</sup>),  $V_P$  (km/s) and  $V_S$  (km/s) of Sr<sub>3</sub>CO<sub>5</sub>-*Cmcm* and Sr<sub>3</sub>CO<sub>5</sub>-*I4/mcm* obtained via DPMD simulations at 0 K and compared with DFT calculation results (in parentheses).

|          | Sr <sub>3</sub> CO <sub>5</sub> - <i>Cmcm</i> |               | Sr <sub>3</sub> CO <sub>5</sub> - <i>I4/mcm</i> |               |               |
|----------|-----------------------------------------------|---------------|-------------------------------------------------|---------------|---------------|
|          | 10 GPa                                        | 30 GPa        | 30 GPa                                          | 80 GPa        | 120 GPa       |
| $C_{11}$ | 213.1 (224.0)                                 | 361.5 (361.7) | 323.5 (321.0)                                   | 560.4 (561.9) | 747.1 (741.8) |
| $C_{12}$ | 66.5 (71.6)                                   | 144.6 (126.1) | 146.5 (150.0)                                   | 271.2 (287.2) | 380.9 (396.1) |
| $C_{13}$ | 88.9 (93.5)                                   | 158.8 (141.9) | 184.3 (176.0)                                   | 342.1 (336.0) | 463.8 (459.4) |
| $C_{22}$ | 219.7 (221.3)                                 | 375.1 (339.4) | -                                               | -             | -             |
| $C_{23}$ | 105.7 (107.1)                                 | 207.1 (186.6) | -                                               | -             | -             |
| $C_{33}$ | 266.5 (269.6)                                 | 418.5 (398.2) | 354.3 (351.1)                                   | 569.4 (574.7) | 720.5 (736.3) |
| $C_{44}$ | 78.3 (86.1)                                   | 110.2 (121.2) | 119.6 (128.1)                                   | 202.1 (205.7) | 239.0 (259.1) |
| $C_{55}$ | 79.0 (77.4)                                   | 93.8 (90.4)   | -                                               | -             | -             |
| $C_{66}$ | 44.7 (48.9)                                   | 66.8 (63.6)   | 108.4 (105.3)                                   | 169.5 (163.9) | 206.4 (203.7) |
| $B$      | 135.7 (138.5)                                 | 240.0 (221.8) | 224.7 (221.2)                                   | 398.9 (401.2) | 536.4 (538.4) |
| $G$      | 67.9 (70.5)                                   | 95.1 (95.1)   | 99.4 (102.8)                                    | 158.2 (159.6) | 190.9 (197.8) |
| $\rho$   | 5.3 (5.3)                                     | 5.9 (5.9)     | 6.0 (6.0)                                       | 7.1 (7.1)     | 7.7 (7.7)     |
| $V_P$    | 6.5 (6.6)                                     | 7.8 (7.7)     | 7.7 (7.7)                                       | 9.3 (9.3)     | 10.1 (10.1)   |
| $V_S$    | 3.6 (3.6)                                     | 4.0 (4.0)     | 4.1 (4.1)                                       | 4.7 (4.7)     | 5.0 (5.0)     |

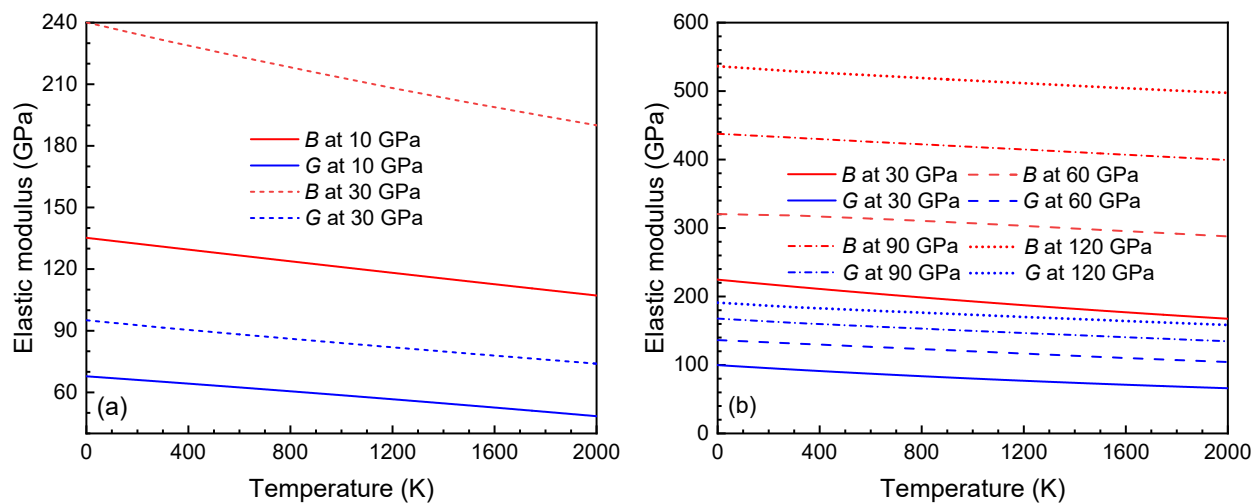

Fig. S1 The elastic moduli of (a)  $\text{Sr}_3\text{CO}_5\text{-Cmcm}$  and (b)  $\text{Sr}_3\text{CO}_5\text{-I4/mcm}$  as a function of temperature obtained from DPMD simulations.

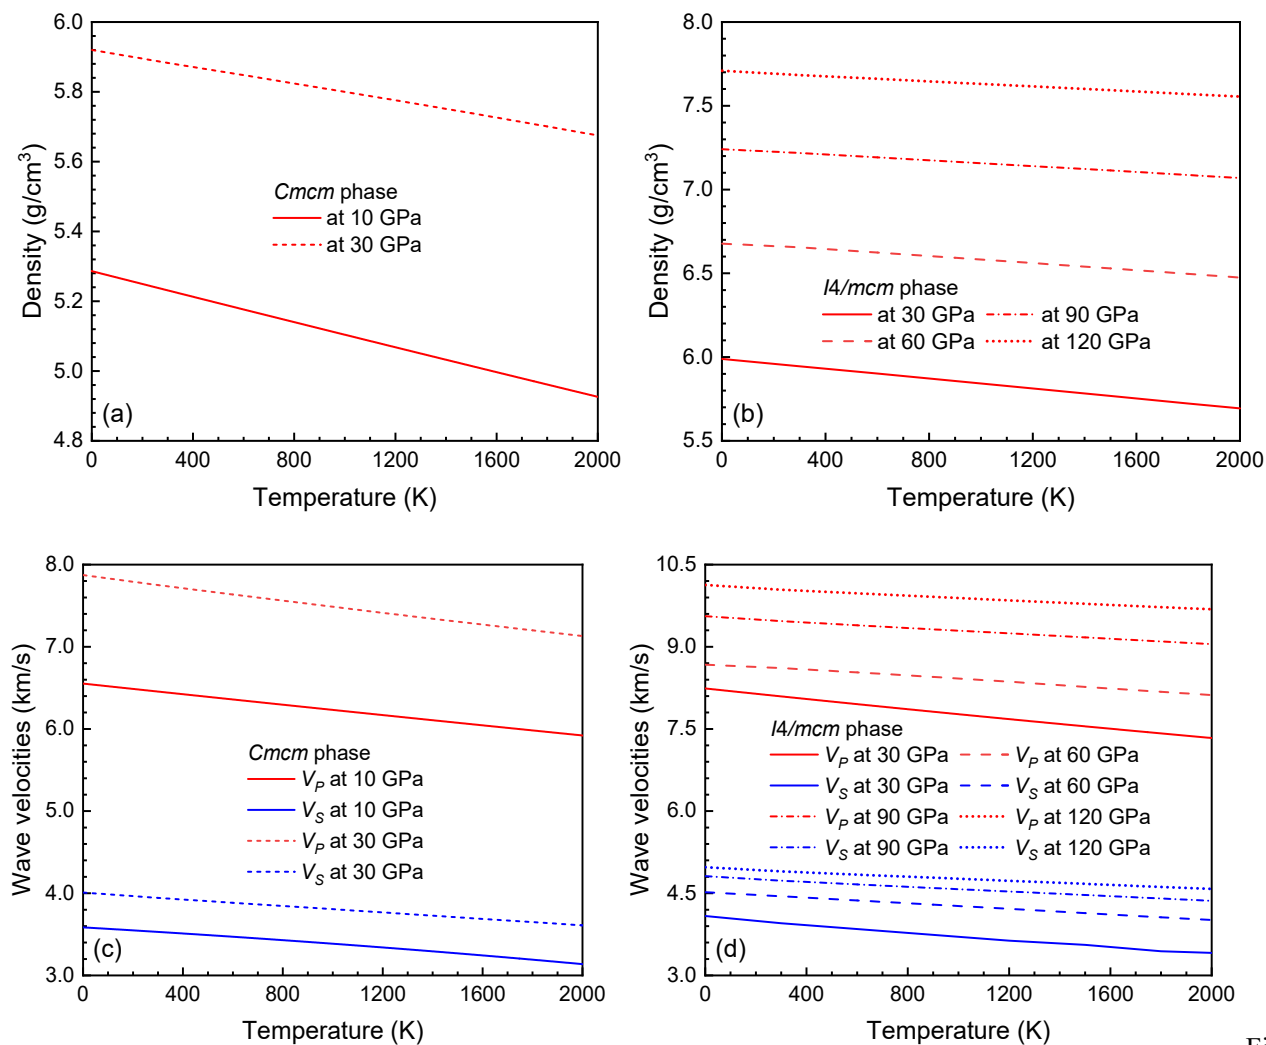

Fig.

S2 Temperature dependence of density and sound velocities for  $\text{Sr}_3\text{CO}_5$ - $Cmcm$  and  $\text{Sr}_3\text{CO}_5$ - $I4/mcm$  obtained by DPMD simulations, with (a) and (c) representing the  $Cmcm$  phase, (b) and (d) representing the  $I4/mcm$  phase.
